# Supplementary material for: Chlamydia pecorum Ovine Abortion: Associations between Maternal Infection and Perinatal Mortality
Source: MDPI journal article supplement (doi:10.3390/pathogens10111367), 2021-10-22
Supplement: s1 [file s1]

Table S1. Results of serological testing and qPCR testing of vaginal, rectal and conjunctival swabs from PNM positive and negative ewes

| Animal ID | PNM | CFT titre<br>TP1 | CFT titre <sup>a</sup><br>TP2 | qPCR TP1 <sup>b</sup><br>(swab type) | qPCR TP2 <sup>b</sup><br>(swab type) |
|-----------|-----|------------------|-------------------------------|--------------------------------------|--------------------------------------|
| 1         | (+) | <8               | 16                            | -                                    | -                                    |
| 2         | (+) | <8               | 16                            | -                                    | -                                    |
| 3         | (-) | <8               | 64                            | -                                    | -                                    |
| 4         | (+) | 128              | 16                            | + V, R, C                            | + V                                  |
| 5         | (+) | 64               | 32                            | -                                    | -                                    |
| 6         | (+) | 32               | 64                            | -                                    | -                                    |
| 7         | (+) | 64               | 32                            | + R                                  | + R                                  |
| 8         | (+) | <8               | 16                            | -                                    | -                                    |
| 9         | (-) | <8               | 8                             | + C                                  | + C                                  |
| 10        | (-) | 16               | 16                            | -                                    | -                                    |
| 11        | (+) | 16               | 32                            | -                                    | -                                    |
| 12        | (+) | 32               | 32                            | -                                    | -                                    |
| 13        | (+) | <8               | <8                            | -                                    | -                                    |
| 14        | (-) | 32               | 32                            | -                                    | -                                    |
| 15        | (-) | 8                | 16                            | -                                    | -                                    |
| 16        | (+) | 16               | 16                            | -                                    | -                                    |
| 17        | (+) | 16               | 8                             | -                                    | -                                    |
| 18        | (-) | <8               | 8                             | -                                    | -                                    |
| 19        | (-) | 8                | <8                            | -                                    | -                                    |
| 20        | (-) | <8               | 16                            | -                                    | -                                    |
| 21        | (-) | 8                | 16                            | -                                    | -                                    |
| 22        | (+) | 64               | NT                            | -                                    | -                                    |
| 23        | (-) | <8               | <8                            | -                                    | + C                                  |
| 24        | (-) | <8               | 16                            | -                                    | + V, R                               |
| 25        | (-) | <8               | 32                            | + R                                  | + V                                  |
| 26        | (-) | 32               | 16                            | -                                    | + V                                  |
| 27        | (-) | 16               | 16                            | -                                    | + R                                  |
| 28        | (-) | <8               | 8                             | -                                    | -                                    |
| 29        | (-) | <8               | 32                            | -                                    | -                                    |
| 30        | (-) | <8               | 8                             | -                                    | -                                    |
| 31        | (-) | <8               | 8                             | + V, R                               | + V                                  |
| 32        | (-) | 16               | 16                            | + R                                  | -                                    |
| 33        | (+) | <8               | 16                            | + V                                  | + R                                  |
| 34        | (-) | 32               | 16                            | + V                                  | -                                    |
| 35        | (-) | <8               | NT                            | -                                    | -                                    |
| 36        | (+) | 16               | NT                            | + R                                  | -                                    |
| 37        | (-) | 32               | NT                            | -                                    | -                                    |
| 38        | (+) | 16               | NT                            | + R                                  | -                                    |
| 39        | (-) | 8                | NT                            | + C                                  | -                                    |
| 40        | (+) | 32               | NT                            | -                                    | -                                    |
| 41        | (+) | 64               | NT                            | -                                    | -                                    |
| 42        | (+) | 64               | NT                            | -                                    | -                                    |

|    |     |    |    |     |   |
|----|-----|----|----|-----|---|
| 43 | (+) | 64 | NT | -   | - |
| 44 | (-) | 32 | NT | -   | - |
| 45 | (+) | 64 | NT | -   | - |
| 46 | (+) | 64 | NT | -   | - |
| 47 | (+) | 64 | NT | + R | - |
| 48 | (+) | 64 | NT | + R | - |
| 49 | (+) | 32 | NT | -   | - |
| 50 | (+) | 8  | NT | -   | - |
| 51 | (-) | 32 | NT | -   | - |
| 52 | (-) | 32 | NT | -   | - |
| 53 | (+) | 16 | NT | -   | - |
| 54 | (-) | <8 | NT | -   | - |

---

<sup>a</sup>NT = not tested

<sup>b</sup>V = vaginal swab, R = rectal swab, C = conjunctival swab
