# Supplementary material for: Chlamydia pecorum Ovine Abortion: Associations between Maternal Infection and Perinatal Mortality
Source: MDPI journal article supplement (doi:10.3390/pathogens10111367), 2021-10-22
Supplement: s1 [file s1]

Table S2: 18-13680-18FL assembly statistics before and after extraction of *Chlamydia* spp. contigs

| 18-13680-18FL         | Raw assembly -<br>pre-extraction | Raw assembly -<br>Post-extraction | Polished assembly<br>Chromosome | Polished assembly<br>Plasmid |
|-----------------------|----------------------------------|-----------------------------------|---------------------------------|------------------------------|
| # contigs             | 1,683                            | 2                                 | 1                               | 1                            |
| Largest contig        | 1,106,572                        | 1,106,572                         | 1,105,979                       | 7,513                        |
| Total length          | 3,846,963                        | 1,114,218                         | 1,105,979                       | 7,513                        |
| GC (%)                | 42.17                            | 40.99                             | 41.07                           | 31.55                        |
| Coverage<br>depth (x) | 18.02                            | 20.24                             | 19.16                           | 176.04                       |
| N50                   | 6975                             | 1,106,572                         | 1,105,979                       | 7,513                        |
| L50                   | 41                               | 1                                 | 1                               | 1                            |
| # N's/100 kbp         | 0                                | 0                                 | 0                               | 0                            |
