# Supplementary material for: Chlamydia pecorum Ovine Abortion: Associations between Maternal Infection and Perinatal Mortality
Source: MDPI journal article supplement (doi:10.3390/pathogens10111367), 2021-10-22
Supplement: s1 [file s1]

Table S3. SNPs between *C. pecorum* strain 18-13680-18FL sequenced in this study and other *C. pecorum* strains from different hosts.

| <i>C.pecorum</i> strain<br>(host) | 18-<br>13680-<br>18FL | E58  | DBDeUG | IPTaLE | L1   | L17  | L71  | MC-<br>MarsBar | NSW-<br>Bov-<br>SBE | P787 | PV3056-<br>3 | VR629 | W73  |
|-----------------------------------|-----------------------|------|--------|--------|------|------|------|----------------|---------------------|------|--------------|-------|------|
| 18-13680-18FL<br>(Ovine)          | 0                     | 236  | 4926   | 4978   | 6275 | 6536 | 6646 | 4923           | 240                 | 3979 | 6567         | 3171  | 3917 |
| E58 (Bovine)                      | 236                   | 0    | 4735   | 4785   | 6091 | 6336 | 6446 | 4732           | 50                  | 3783 | 6383         | 2975  | 3724 |
| DBDeUG (Koala)                    | 4926                  | 4735 | 0      | 1558   | 5444 | 5710 | 6354 | 1220           | 4749                | 4261 | 5742         | 4041  | 4196 |
| IPTaLE (Koala)                    | 4978                  | 4785 | 1558   | 0      | 5667 | 5815 | 6411 | 1564           | 4803                | 4379 | 5901         | 4155  | 4279 |
| L1 (Porcine)                      | 6275                  | 6091 | 5444   | 5667   | 0    | 2379 | 3799 | 5461           | 6107                | 6810 | 2687         | 6651  | 6797 |
| L17 (Porcine)                     | 6536                  | 6336 | 5710   | 5815   | 2379 | 0    | 3727 | 5702           | 6352                | 6992 | 2810         | 6853  | 6962 |
| L71 (Porcine)                     | 6646                  | 6446 | 6354   | 6411   | 3799 | 3727 | 0    | 6298           | 6462                | 7161 | 4033         | 6975  | 7034 |
| MC-MarsBar (Koala)                | 4923                  | 4732 | 1220   | 1564   | 5461 | 5702 | 6298 | 0              | 4748                | 4365 | 5860         | 4057  | 4256 |
| NSW-Bov-SBE<br>(Bovine)           | 240                   | 50   | 4749   | 4803   | 6107 | 6352 | 6462 | 4748           | 0                   | 3801 | 6399         | 2993  | 3740 |
| P787 (Ovine)                      | 3979                  | 3783 | 4261   | 4379   | 6810 | 6992 | 7161 | 4365           | 3801                | 0    | 7091         | 2887  | 2063 |
| PV3056-3 (Bovine)                 | 6567                  | 6383 | 5742   | 5901   | 2687 | 2810 | 4033 | 5860           | 6399                | 7091 | 0            | 6932  | 7043 |
| VR629 (Ovine)                     | 3171                  | 2975 | 4041   | 4155   | 6651 | 6853 | 6975 | 4057           | 2993                | 2887 | 6932         | 0     | 2817 |
| W73 (Ovine)                       | 3917                  | 3724 | 4196   | 4279   | 6797 | 6962 | 7034 | 4256           | 3740                | 2063 | 7043         | 2817  | 0    |
