# Supplementary material for: Chlamydia pecorum Ovine Abortion: Associations between Maternal Infection and Perinatal Mortality
Source: MDPI journal article supplement (doi:10.3390/pathogens10111367), 2021-10-22
Supplement: s1 [file s1]

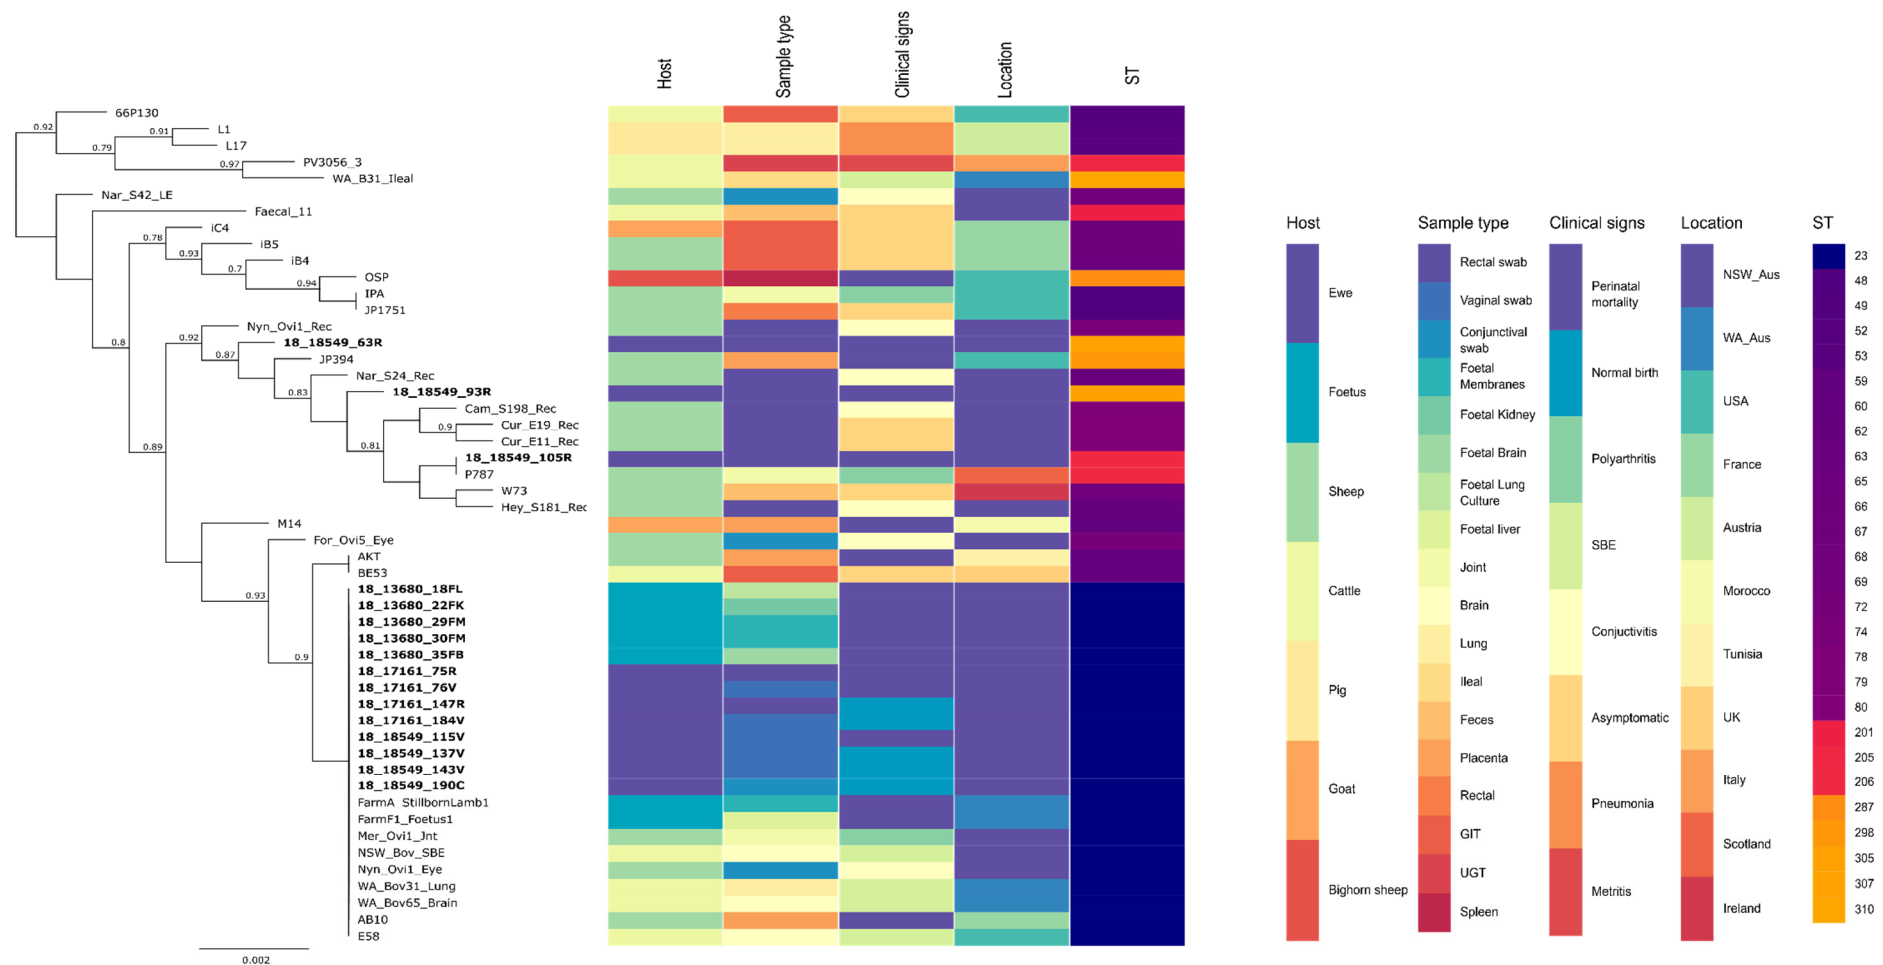

Figure S2. Phylogenetic relationships of the *C. pecorum* strains from ewes from this study and other livestock hosts. The mid-point rooted tree was constructed using a 3095 bp concatenated MLST sequences alignment from the 51 *C. pecorum* strains, including the ewes and foetal *C. pecorum* strains described in this and previous study [14] (highlighted in bold). Support values of > 0.7 are displayed on the tree nodes. Metadata for each strain denotes: hosts where sheep, ewe and foetus are denoted separately for descriptive reasons; sample types; clinical signs; geographical location where for Australia two regions are denoted (Aus\_NSW and Aus\_WA); and STs.
