# Supplementary material for: Chlamydia pecorum Ovine Abortion: Associations between Maternal Infection and Perinatal Mortality
Source: MDPI journal article supplement (doi:10.3390/pathogens10111367), 2021-10-22
Supplement: s1 [file s1]

Table S5. Metadata associated with *C. pecorum* STs from this study and presented in Figure S2.

| Sample name          | Host   | Sample type         | Clinical signs      | Location | ST  |
|----------------------|--------|---------------------|---------------------|----------|-----|
| 18_18549_63R         | Ewe    | Rectal swab         | Perinatal mortality | NSW_Aus  | 307 |
| 18_17161_75R         | Ewe    | Rectal swab         | Perinatal mortality | NSW_Aus  | 23  |
| 18_18549_93R         | Ewe    | Rectal swab         | Perinatal mortality | NSW_Aus  | 305 |
| 18_18549_105R        | Ewe    | Rectal swab         | Perinatal mortality | NSW_Aus  | 206 |
| 18_17161_147R        | Ewe    | Rectal swab         | Normal birth        | NSW_Aus  | 23  |
| 18_17161_76V         | Ewe    | Vaginal swab        | Perinatal mortality | NSW_Aus  | 23  |
| 18_18549_115V        | Ewe    | Vaginal swab        | Perinatal mortality | NSW_Aus  | 23  |
| 18_18549_137V        | Ewe    | Vaginal swab        | Normal birth        | NSW_Aus  | 23  |
| 18_18549_143V        | Ewe    | Vaginal swab        | Normal birth        | NSW_Aus  | 23  |
| 18_17161_184V        | Ewe    | Vaginal swab        | Normal birth        | NSW_Aus  | 23  |
| 18_18549_190C        | Ewe    | Conjunctival swab   | Normal birth        | NSW_Aus  | 23  |
| 18_13680_29FM        | Foetus | Foetal Membranes    | Perinatal mortality | NSW_Aus  | 23  |
| 18_13680_30FM        | Foetus | Foetal Membranes    | Perinatal mortality | NSW_Aus  | 23  |
| 18_13680_22FK        | Foetus | Foetal Kidney       | Perinatal mortality | NSW_Aus  | 23  |
| 18_13680_35FB        | Foetus | Foetal Brain        | Perinatal mortality | NSW_Aus  | 23  |
| 18_13680_18FL        | Foetus | Foetal Lung Culture | Perinatal mortality | NSW_Aus  | 23  |
| FarmA_StillbornLamb1 | Foetus | Foetal Membranes    | Perinatal mortality | WA_Aus   | 23  |
| FarmF1_Foetus1       | Foetus | Foetal liver        | Perinatal mortality | WA_Aus   | 23  |
| Mer_Ovi1_Int         | Sheep  | Joint               | Polyarthritits      | NSW_Aus  | 23  |
| NSW_Bov_SBE          | Cattle | Brain               | SBE                 | NSW_Aus  | 23  |
| WA_Bov65_Brain       | Cattle | Brain               | SBE                 | WA_Aus   | 23  |
| WA_Bov31_Lung        | Cattle | Lung                | SBE                 | WA_Aus   | 23  |
| WA_B31_Ileal         | Cattle | Ileal               | SBE                 | WA_Aus   | 310 |
| Hey_S181_Rec         | Sheep  | Rectal swab         | Conjunctivitis      | NSW_Aus  | 62  |
| Nar_S24_Rec          | Sheep  | Rectal swab         | Conjunctivitis      | NSW_Aus  | 63  |
| Cur_E11_Rec          | Sheep  | Rectal swab         | Asymptomatic        | NSW_Aus  | 78  |
| Cur_E19_Rec          | Sheep  | Rectal swab         | Asymptomatic        | NSW_Aus  | 80  |
| Faecal_11            | Cattle | Feces               | Asymptomatic        | NSW_Aus  | 201 |
| For_Ovi5_Eye         | Sheep  | Conjunctival swab   | Conjunctivitis      | NSW_Aus  | 72  |
| Nyn_Ovi1_Eye         | Sheep  | Conjunctival swab   | Conjunctivitis      | NSW_Aus  | 23  |
| Nyn_Ovi1_Rec         | Sheep  | Rectal swab         | Conjunctivitis      | NSW_Aus  | 74  |
| Cam_S198_Rec         | Sheep  | Rectal swab         | Conjunctivitis      | NSW_Aus  | 79  |
| Nar_S42_LE           | Sheep  | Conjunctival swab   | Conjunctivitis      | NSW_Aus  | 69  |
| E58                  | Cattle | Brain               | SBE                 | USA      | 23  |
| AB10                 | Sheep  | Placenta            | Perinatal mortality | France   | 23  |
| IPA                  | Sheep  | Joint               | Polyarthritits      | USA      | 48  |
| JP1751               | Sheep  | Rectal              | Asymptomatic        | USA      | 48  |
| 66P130               | Cattle | GIT                 | Asymptomatic        | USA      | 49  |
| L1                   | Pig    | Lung                | Pneumonia           | Austria  | 52  |
| L17                  | Pig    | Lung                | Pneumonia           | Austria  | 53  |
| M14                  | Goat   | Placenta            | Perinatal mortality | Morocco  | 59  |
| AKT                  | Sheep  | Placenta            | Perinatal mortality | Tunisia  | 60  |
| BE53                 | Cattle | GIT                 | Asymptomatic        | UK       | 60  |
| iB4                  | Sheep  | GIT                 | Asymptomatic        | France   | 65  |
| iB5                  | Sheep  | GIT                 | Asymptomatic        | France   | 66  |

|          |         |          |                     |          |     |
|----------|---------|----------|---------------------|----------|-----|
| iC4      | Goat    | GIT      | Asymptomatic        | France   | 67  |
| PV3056_3 | Cattle  | UGT      | Metritis            | Italy    | 205 |
| P787     | Sheep   | Joint    | Polyarthritis       | Scotland | 206 |
| JP394    | Sheep   | Placenta | Perinatal mortality | USA      | 298 |
| W73      | Sheep   | Faeces   | Asymptomatic        | Ireland  | 68  |
|          | Bighorn |          |                     |          |     |
| OSP      | sheep   | Spleen   | Perinatal mortality | USA      | 287 |

---
