# Supplementary material for: Chlamydia pecorum Ovine Abortion: Associations between Maternal Infection and Perinatal Mortality
Source: MDPI journal article supplement (doi:10.3390/pathogens10111367), 2021-10-22
Supplement: s1 [file s1]

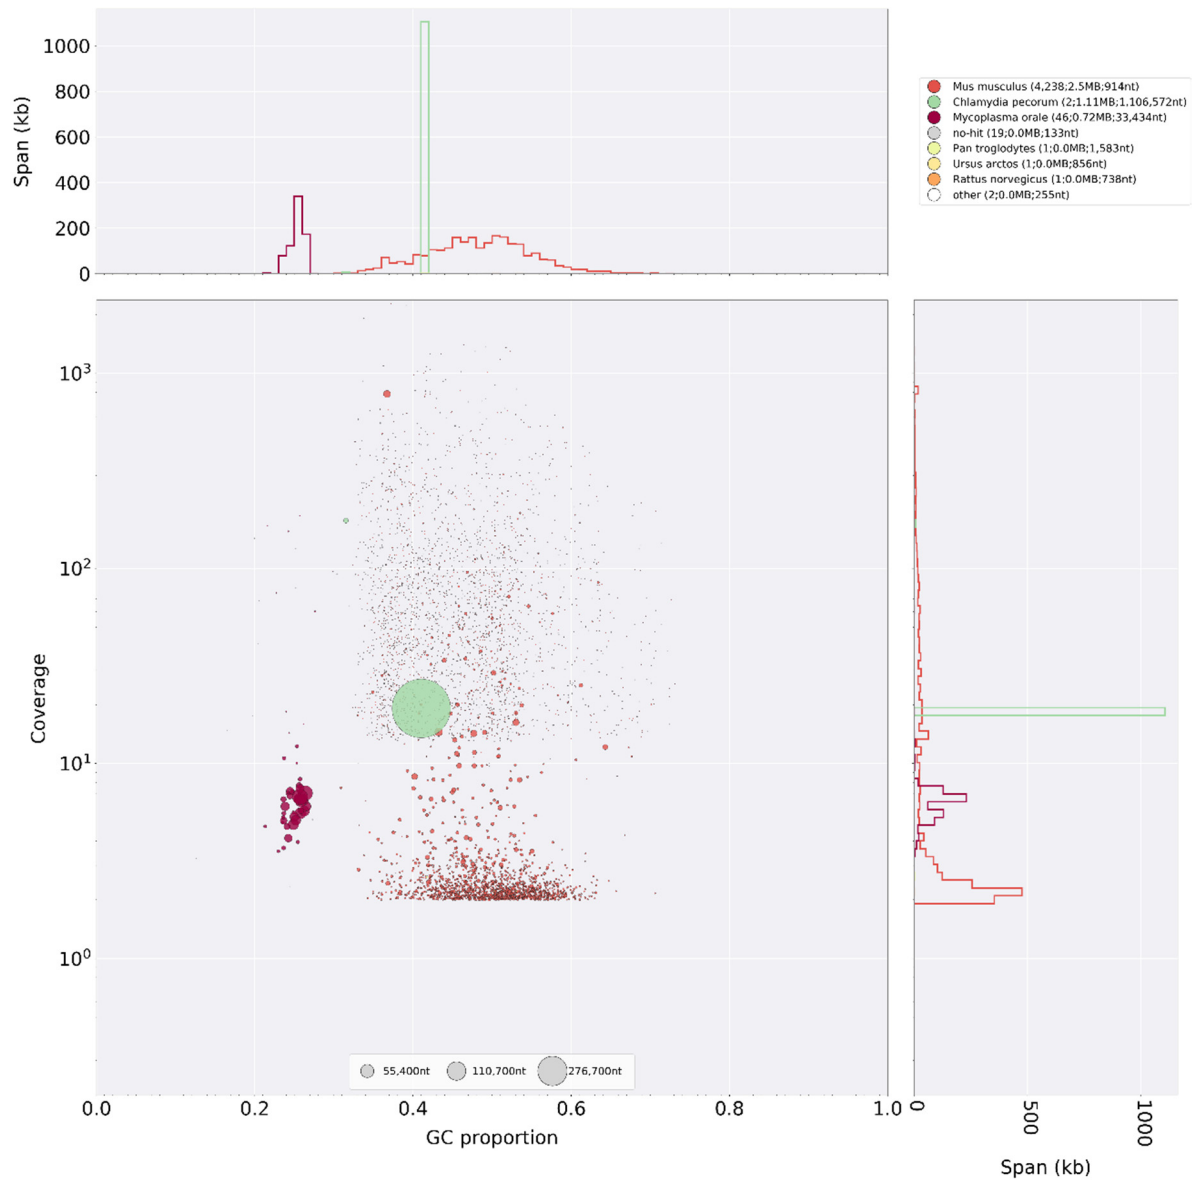

Figure S1. Blobplot showing sequence coverage vs %GC for each contig in the raw assembly generated by Spades. Scaffolds are coloured by best BLASTN match and scaffold size is represented by blob size. Two *C. pecorum* scaffolds were identified by BLASTN and represented the chromosome and plasmid. These scaffolds were separated for further study. Figure was generated with Blobttools.
